# Supplementary material for: Strong enhancement of second harmonic generation in nonlinear optical crystals: 2-amino-3-nitropyridinium halides (Cl, Br, I)
Source: Royal Society of Chemistry journal article supplement (doi:10.1039/c4tc01002g), 2014-01-01

# Strong Enhancement of Second Harmonic Generation in Nonlinear Optical Crystals: 2-Amino-3-nitropyridinium Halides (Cl, Br, I)

Tianliang Chen,<sup>a</sup> Zhihua Sun,<sup>abc</sup> Xitao Liu,<sup>c</sup> Jinyun Wang,<sup>a</sup> Yuelan Zhou,<sup>d</sup> Chengmin Ji,<sup>a</sup> Shuquan Zhang,<sup>ab</sup> Lina Li,<sup>a</sup> Junhua Luo,<sup>\*ab</sup> and Zhong-Ning Chen<sup>a</sup>

## Supporting information

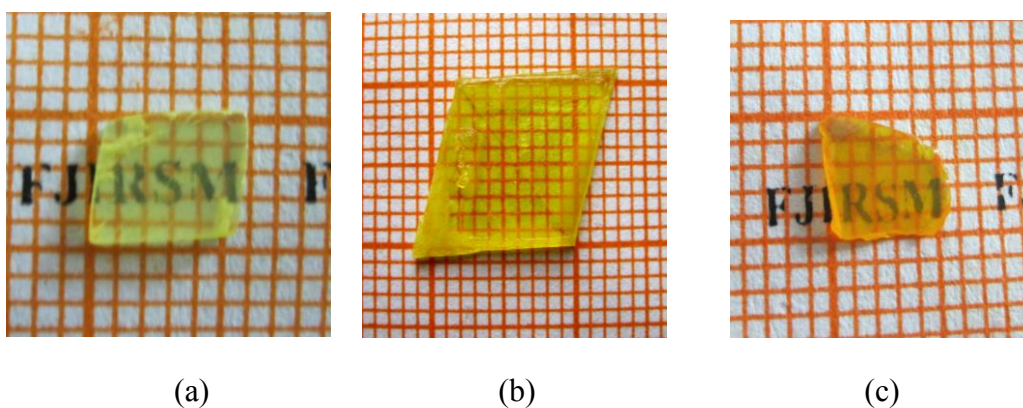

Figure S1. Photographs of crystal for (a) 2A3NPCl, (b) 2A3NPBr, (c) 2A3NPI

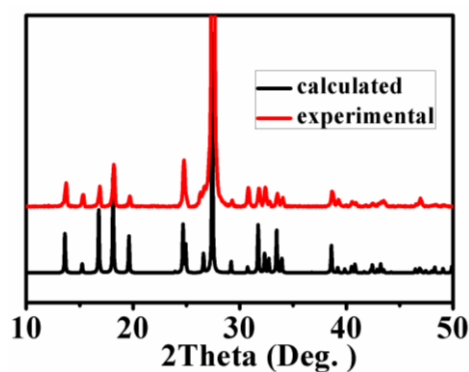

(a)

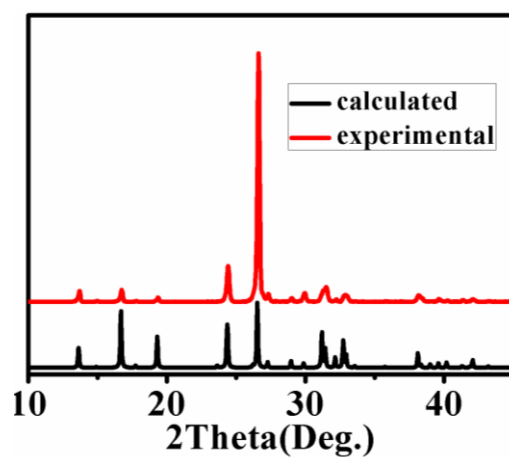

(b)

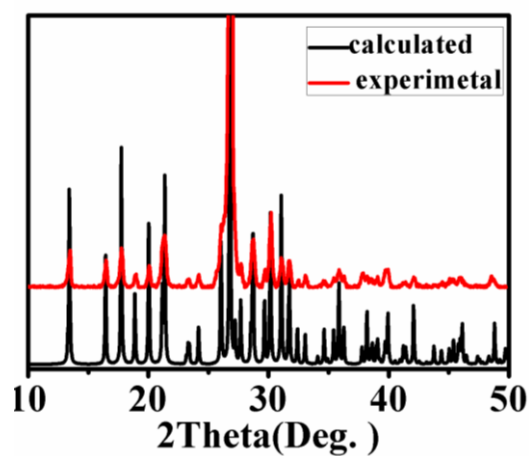

(c)

Figure S2. Experimental and calculated powder X-ray diffraction patterns for (a) 2A3NPI, (b) 2A3NPBr, (c) 2A3NPI.

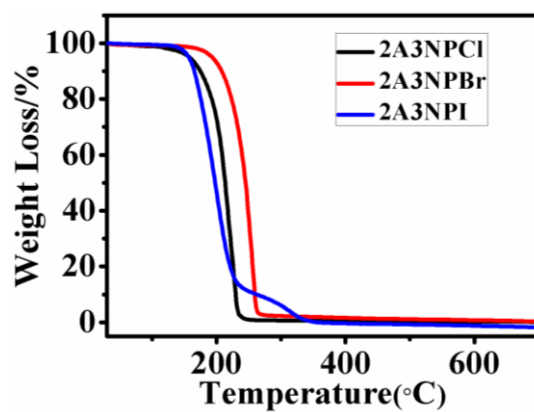

Figure S3. TGA curves of 2A3NPI, 2A3NPBr and 2A3NPI.

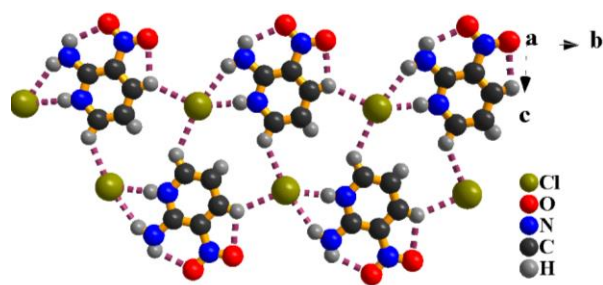

Figure S4. The anion-cation chain along b-axis of 2A2NPCl

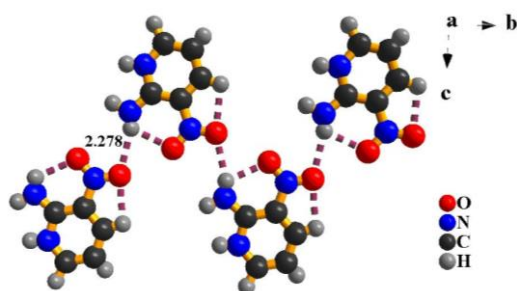

Figure S5. The zigzag chain by the unique intermolecular hydrogen bonds (N2–H2A...O2) extending along *c*-axis of 2A3NPCl.

Table S1. The calculated bond length and angles of hydrogen bonds in 2A3NPI by functional B3LYP with the 6-311+ G (d) mode.

|     | $d_{\text{I-H1}}$ | $d_{\text{I-N1}}$ | $d_{\text{I-H2}}$ | $d_{\text{I-N2}}$ | $\angle \text{N1-H1}\cdots\text{I}$ | $\angle \text{N2-H2}\cdots\text{I}$ |
|-----|-------------------|-------------------|-------------------|-------------------|-------------------------------------|-------------------------------------|
| L4I | 2.60438           | 3.46168           | 2.83303           | 3.63492           | 164.75895                           | 152.21141                           |
| L3I | 2.74247           | 3.59465           | 3.07529           | 3.91869           | 173.57058                           | 157.44878                           |

L4I: 2A3NPI

L3I: The molecular arrangement of 2A3NPI is supposed to be the same as that of 2A3NPBr as shown in the following caption.

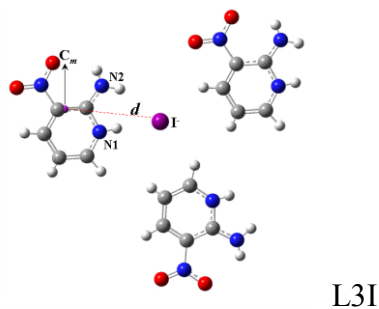

Supplement: c4tc01002g1.pdf [file c4tc01002g1.pdf]
